# Supplementary material for: Decreasing human body temperature in the United States since the Industrial Revolution
Source: eLife. 2020 Jan 7;9:e49555. doi: 10.7554/eLife.49555 (PMC6946399; doi:10.7554/eLife.49555)
Supplement: Figure 1—figure supplement 2—source code 1. [file elife-49555-fig1-figsupp2-code1.rmd]

---
title: "Figure supplement 2"
output: html_document
---
```{r message = FALSE, warning = FALSE}
library(easyGgplot2)
#ggplot2.multiplot(..., plotlist=NULL, cols=2)
library(easyGgplot2)
library(lme4)
library(merTools)
combinedData <- read.csv("~/Desktop/Temperature study/combined_data.csv")

combinedData$time_HR_imputed <- combinedData$time_HR
combinedData$time_HR_imputed[is.na(combinedData$time_HR_imputed)] <- 12

dataVeterans  <- read.csv('~/Desktop/Temperature study/veterans_processed.csv')
dataNHANES    <- read.csv('~/Desktop/Temperature study/NHANES_processed.csv')
ST_data 	  <- read.csv('~/Desktop/Temperature study/STRIDE_processed.csv')

dataVeterans$race <- factor(as.character(dataVeterans$race),levels = c("white", "black"))
combinedData$race [combinedData$race=="asian"]<- "other"
combinedData$race <- factor(combinedData$race,levels = c("white", "black","other" ))
dataNHANES$race[dataNHANES$race == "unknown"] <- NA
dataNHANES$race <- factor(dataNHANES$race,levels = c("white", "black","other" ))
ST_data$race [ST_data$race=="Asian"]<- "Other"
ST_data$race <- factor(ST_data$race,levels = c("White", "Black","Other"))
ST_data$exam_month<-factor (ST_data$exam_month)

dataVeterans$state_type <- factor(dataVeterans$state_type, levels = c("very cold", "cold","moderately_cold","moderate","warm", "hot"))

dataNHANES$exammonth <-as.factor(dataNHANES$exammonth)
dataVeterans$exammonth <-as.factor(dataVeterans$exammonth)


state_temps <- read.csv("~/Desktop/Temperature study/state_temps.csv")
state_codes <- read.csv("~/Desktop/Temperature study/state_codes.csv")
state_codes$Code <- factor(as.character(state_codes$Code), levels=levels(dataVeterans$state))
state_temps$state_code <- state_codes$Code[match(as.character(state_temps$state),as.character(state_codes$State))]

dataVeterans$ambient_temp <- (state_temps$value[match(paste(dataVeterans$state,(dataVeterans$examyear * 100 + as.numeric(dataVeterans$exammonth))), paste(state_temps$state_code,state_temps$date))] - 32) / 1.8

ST_data$state <- "CA"
  
ST_data$ambient_temp <- (state_temps$value[match(paste(ST_data$state,(ST_data$exam_year * 100 + as.numeric(ST_data$exam_month))), paste(state_temps$state_code,state_temps$date))] - 32) / 1.8


```

Figure 1-figure supplement 2: Analysis using BMI adjusted for height. 
Coefficients (and standard errors) are from multivariate linear regression models for each cohort including age, height, BMI adjusted for height and time of day (as available). NHANES I includes population weights. *, **, *** indicates significance at the 90%, 95%, and 99% level, respectively.


```{r message = FALSE, warning = FALSE}
lm_bmi_adj <- lm(BMI ~ heightCM, data= dataVeterans)
dataVeterans$bmi_adj <- residuals(lm_bmi_adj)
summary (lm_bmi_adj)

base_h <- 170
base_w <- 70
base_bmi <- base_w / (base_h/100)^2
base_bmi_adj <- base_bmi - (predict(lm_bmi_adj,data.frame(heightCM=base_h)))
 
 
```

```{r message = FALSE, warning = FALSE}
lmVets_bmi_adj <-lm(temp_C ~ age + heightCM  + bmi_adj+ race, data=dataVeterans )
summary(lmVets_bmi_adj)
lmVeterans_predict=data.frame(age=30, weightKG=70, heightCM = 170, bmi_adj=base_bmi_adj, race="white")

round(predict(lmVets_bmi_adj, lmVeterans_predict, interval="confidence"),2)
```

```{r message = FALSE, warning = FALSE}
dataNHANES$bmi_adj <- residuals(lm(BMI ~ height_CM, data=dataNHANES))

lmNHANES_BMI_adj_F <-lm(temp_C ~ age + height_CM  + bmi_adj + race + time_HR, data=dataNHANES[dataNHANES$sex == "female", ],weights=dataNHANES$sample_weights[dataNHANES$sex=="female" ])
summary(lmNHANES_BMI_adj_F)

NHANES_predict=data.frame (age=30, weight_KG=70, height_CM = 170, bmi_adj=base_bmi_adj, race="white", sex ="female", time_HR=12)
round(predict(lmNHANES_BMI_adj_F, NHANES_predict, interval="confidence"),2)

```

```{r message = FALSE, warning = FALSE}
lmNHANES_BMI_adj <-lm(temp_C ~ age + height_CM  + bmi_adj + race +time_HR, data=dataNHANES[dataNHANES$sex == "male", ],weights=dataNHANES$sample_weights[dataNHANES$sex=="male" ])
summary(lmNHANES_BMI_adj)

NHANES_predict=data.frame (age=30, weight_KG=70, height_CM = 170, bmi_adj=base_bmi_adj, race="white", sex ="male", time_HR=12)
round(predict(lmNHANES_BMI_adj, NHANES_predict, interval="confidence"),2)

```


```{r message = FALSE, warning = FALSE}
ST_data$bmi_adj <- residuals(lm(BMI ~ height_CM, data=ST_data))
lmSTRIDE_BMI_adj_F <-lm(temp_C ~ age_years + height_CM  + bmi_adj + race +time_HR, data=ST_data[ST_data$GENDER  == "Female" , ])

summary (lmSTRIDE_BMI_adj_F)

STRIDE_predict=data.frame(age_years=30, weight_KG=70, height_CM = 170, time_HR=12, bmi_adj=base_bmi_adj, race="White", GENDER = "Female")

round(predict(lmSTRIDE_BMI_adj_F, STRIDE_predict, interval="confidence"),2)

```

```{r message = FALSE, warning = FALSE}
lmSTRIDE_BMI_adj <-lm(temp_C ~ age_years + height_CM  + bmi_adj + race + time_HR,
data=ST_data[ST_data$GENDER  == "Male" , ])

summary (lmSTRIDE_BMI_adj)


STRIDE_predict=data.frame(age_years=30, weight_KG=70, height_CM = 170, time_HR=12,
bmi_adj=base_bmi_adj, race="White", GENDER = "Male")
round(predict(lmSTRIDE_BMI_adj, STRIDE_predict, interval="confidence"),2)
```
