# Supplementary material for: Decreasing human body temperature in the United States since the Industrial Revolution
Source: eLife. 2020 Jan 7;9:e49555. doi: 10.7554/eLife.49555 (PMC6946399; doi:10.7554/eLife.49555)
Supplement: Figure 1—figure supplement 5—source code 1. [file elife-49555-fig1-figsupp5-code1.rmd]

---
title: "Figure S5 data source eLife submission"
output: html_document
---

```{r message = FALSE, warning = FALSE}
library(easyGgplot2)
#ggplot2.multiplot(..., plotlist=NULL, cols=2)
library(easyGgplot2)
library(lme4)
library(merTools)
combinedData <- read.csv("~/Desktop/Temperature study/combined_data.csv")

combinedData$time_HR_imputed <- combinedData$time_HR
combinedData$time_HR_imputed[is.na(combinedData$time_HR_imputed)] <- 12

dataVeterans  <- read.csv('~/Desktop/Temperature study/veterans_processed.csv')
dataNHANES    <- read.csv('~/Desktop/Temperature study/NHANES_processed.csv')
ST_data 	  <- read.csv('~/Desktop/Temperature study/STRIDE_processed.csv')

dataVeterans$race <- factor(as.character(dataVeterans$race),levels = c("white", "black"))
combinedData$race [combinedData$race=="asian"]<- "other"
combinedData$race <- factor(combinedData$race,levels = c("white", "black","other" ))
dataNHANES$race[dataNHANES$race == "unknown"] <- NA
dataNHANES$race <- factor(dataNHANES$race,levels = c("white", "black","other" ))
ST_data$race [ST_data$race=="Asian"]<- "Other"
ST_data$race <- factor(ST_data$race,levels = c("White", "Black","Other"))
ST_data$exam_month<-factor (ST_data$exam_month)

dataVeterans$state_type <- factor(dataVeterans$state_type, levels = c("very cold", "cold","moderately_cold","moderate","warm", "hot"))

dataNHANES$exammonth <-as.factor(dataNHANES$exammonth)
dataVeterans$exammonth <-as.factor(dataVeterans$exammonth)


state_temps <- read.csv("~/Desktop/Temperature study/state_temps.csv")
state_codes <- read.csv("~/Desktop/Temperature study/state_codes.csv")
state_codes$Code <- factor(as.character(state_codes$Code), levels=levels(dataVeterans$state))
state_temps$state_code <- state_codes$Code[match(as.character(state_temps$state),as.character(state_codes$State))]

dataVeterans$ambient_temp <- (state_temps$value[match(paste(dataVeterans$state,(dataVeterans$examyear * 100 + as.numeric(dataVeterans$exammonth))), paste(state_temps$state_code,state_temps$date))] - 32) / 1.8

ST_data$state <- "CA"
  
ST_data$ambient_temp <- (state_temps$value[match(paste(ST_data$state,(ST_data$exam_year * 100 + as.numeric(ST_data$exam_month))), paste(state_temps$state_code,state_temps$date))] - 32) / 1.8

```

Month effect analysis

Figure 1-figure supplement 5: Effect of the month of temperature measurement.
Mixed effect predictions and confidence intervals of the month during which the measurement was taken on the measured temperature. A. White men in UACWV, B. white men in NHANES I, C. white men in STRIDE, D. white women in NHANES I, and E. white women in STRIDE

```{r message = FALSE, warning = FALSE}
library(arm)
lmerST_data_month <-lmer(temp_C~ age_years + weight_KG + height_CM + (1 | exam_month), data= ST_data [ST_data$GENDER == "Male" & ST_data$race == "White",])
summary(lmerST_data_month)

lmerST_data_month_re <- data.frame(re=as.numeric(ranef(lmerST_data_month)$exam_month[,1]), se=as.numeric(se.ranef(lmerST_data_month)$exam_month[,1]))
lmerST_data_month_re$low <- lmerST_data_month_re$re - 1.96 * lmerST_data_month_re$se
lmerST_data_month_re$high <- lmerST_data_month_re$re + 1.96 * lmerST_data_month_re$se
lmerST_data_month_re$month <- factor(c("January","February","March","April","May","June","July","August","September","October","November","December"),levels=c("January","February","March","April","May","June","July","August","September","October","November","December"))

lmerST_data_month_re$sex <- "men"
lmerST_data_month_re$race <- "white"
lmerST_data_month_re$period <- "STRIDE"

ggplot(data=lmerST_data_month_re,aes(x=month, y=re, color = "blue")) + geom_point() + geom_linerange(aes(ymin=low, ymax=high)) + labs(title="Month effect on temperature in white men STRIDE", x="", y="Temperature Difference, C", colour="", fill="") + theme(legend.position="none", axis.text.x = element_text(angle = 30, hjust = 1))

```

```{r message = FALSE, warning = FALSE}

library(arm)
lmerST_data_month_F <-lmer(temp_C~ age_years + weight_KG + height_CM + (1 | exam_month), data= ST_data [ST_data$GENDER == "Female" & ST_data$race == "White",])
summary(lmerST_data_month_F)

lmerST_data_month_F_re <- data.frame(re=as.numeric(ranef(lmerST_data_month_F)$exam_month[,1]), se=as.numeric(se.ranef(lmerST_data_month_F)$exam_month[,1]))
lmerST_data_month_F_re$low <- lmerST_data_month_F_re$re - 1.96 * lmerST_data_month_F_re$se
lmerST_data_month_F_re$high <- lmerST_data_month_F_re$re + 1.96 * lmerST_data_month_F_re$se
lmerST_data_month_F_re$month <- factor(c("January","February","March","April","May","June","July","August","September","October","November","December"),levels=c("January","February","March","April","May","June","July","August","September","October","November","December"))

lmerST_data_month_F_re$sex <- "women"
lmerST_data_month_F_re$race <- "white"
lmerST_data_month_F_re$period <- "STRIDE"

ggplot(data=lmerST_data_month_F_re,aes(x=month, y=re, color = "red")) + geom_point() + geom_linerange(aes(ymin=low, ymax=high)) + labs(title="Month effect on temperature in white women in STRIDE", x="", y="Temperature Difference, C", colour="", fill="") + theme(legend.position="none", axis.text.x = element_text(angle = 30, hjust = 1))

```

```{r message = FALSE, warning = FALSE}
library(arm)
lmerVeterans_month <-lmer(temp_C~ age + weightKG + heightCM + (1 | exammonth), data= dataVeterans [dataVeterans$race == "white",])
summary(lmerVeterans_month)

lmerVeterans_month_re <- data.frame(re=as.numeric(ranef(lmerVeterans_month)$exammonth[,1]), se=as.numeric(se.ranef(lmerVeterans_month)$exammonth[,1]))
lmerVeterans_month_re$low <- lmerVeterans_month_re$re - 1.96 * lmerVeterans_month_re$se
lmerVeterans_month_re$high <- lmerVeterans_month_re$re + 1.96 * lmerVeterans_month_re$se
lmerVeterans_month_re$month <- factor(c("January","February","March","April","May","June","July","August","September","October","November","December"),levels=c("January","February","March","April","May","June","July","August","September","October","November","December"))

lmerVeterans_month_re$sex <- "men"
lmerVeterans_month_re$race <- "white"
lmerVeterans_month_re$period <- "UAVCW"
ggplot(data=lmerVeterans_month_re,aes(x=month, y=re, color = "red")) + geom_point() + geom_linerange(aes(ymin=low, ymax=high)) + labs(title="Month effect on temperature in white men UAVCW", x="", y="Temperature Difference, C", colour="", fill="") + theme(legend.position="none", axis.text.x = element_text(angle = 30, hjust = 1))
 
```


```{r message = FALSE, warning = FALSE}
 lmerNHANES_month <-lmer(temp_C ~ age + weight_KG + height_CM + (1 | exammonth), data=dataNHANES[dataNHANES$sex == "male" & dataNHANES$race == "white", ], weights=dataNHANES$sample_weights[dataNHANES$sex=="male" & dataNHANES$race == "white"])
summary(lmerNHANES_month)
 
lmerNHANES_month_re <- data.frame(re=as.numeric(ranef(lmerNHANES_month)$exammonth[
,1]), se=as.numeric(se.ranef(lmerNHANES_month)$exammonth[,1]))
lmerNHANES_month_re$low <- lmerNHANES_month_re$re - 1.96 * lmerNHANES_month_re$se
lmerNHANES_month_re$high <- lmerNHANES_month_re$re + 1.96 * lmerNHANES_month_re$se
lmerNHANES_month_re$month <- factor(c("January","February","March","April","May","
June","July","August","September","October","November","December"),levels=c("January","February","March","April","May","June","July","August","September","October","November","December"))
lmerNHANES_month_re$sex <- "men"
lmerNHANES_month_re$race <- "white"
lmerNHANES_month_re$period <- "NHANES"

ggplot(data=lmerNHANES_month_re,aes(x=month, y=re, color = "red")) + geom_point()+ geom_linerange(aes(ymin=low, ymax=high)) + labs(title="Month effect on temperature in white men NHANES", x="", y="Temperature Difference, C", colour="", fill="") + theme(legend.position="none", axis.text.x = element_text(angle = 30, hjust = 1))

```

```{r message = FALSE, warning = FALSE}
 lmNHANES_W_F_month <- lm(temp_C ~ age + weight_KG + height_CM +exammonth, data=dataNHANES[dataNHANES$sex == "female" & dataNHANES$race == "white", ], weights=dataNHANES$sample_weights[dataNHANES$sex=="female" & dataNHANES$race == "white"])
summary(lmNHANES_W_F_month)

```

```{r message = FALSE, warning = FALSE}
lmerNHANES_month_F <-lmer(temp_C ~ age + weight_KG + height_CM + (1 | exammonth),
data=dataNHANES[dataNHANES$sex == "female" & dataNHANES$race == "white", ], weights=dataNHANES$sample_weights[dataNHANES$sex=="female" & dataNHANES$race == "white"])
summary(lmerNHANES_month_F)

 
lmerNHANES_month_F_re <- data.frame(re=as.numeric(ranef(lmerNHANES_month_F)$exammonth[,1]),se=as.numeric(se.ranef(lmerNHANES_month_F)$exammonth[,1]))
lmerNHANES_month_F_re$low <- lmerNHANES_month_F_re$re - 1.96 * lmerNHANES_month_F_re$se
lmerNHANES_month_F_re$high <-lmerNHANES_month_F_re$re + 1.96 * lmerNHANES_month_F_re$se
lmerNHANES_month_F_re$month <- factor(c("January","February","March","April","May","June","July","August","September","October","November","December"),levels=c("January","February","March","April","May","June","July","August","September","October","November","December"))

lmerNHANES_month_F_re$sex <- "women"
lmerNHANES_month_F_re$race <- "white"
lmerNHANES_month_F_re$period <- "NHANES"
ggplot(data=lmerNHANES_month_F_re,aes(x=month, y=re, color = "red")) + geom_point(
) + geom_linerange(aes(ymin=low, ymax=high)) + labs(title="Month effect on temperature in white women NHANES", x="", y="Temperature Difference, C", colour="", fill=
"") + theme(legend.position="none", axis.text.x = element_text(angle = 30, hjust =
1))

```

 
```{r message = FALSE, warning = FALSE}

plot_colors <- c("#FF9233", "#29D0D0", "#81C57A", "#575757", "#8126C0", "#29D0D0" ,"#575757", "#AD2323", "#2A4BD7", "#1D6914", "#814A19", "#8126C0", "#A0A0A0", "#FFEE33", "#FFCDF3") # gg_color_hue(3)

monthlyData <- rbind(lmerNHANES_month_F_re,lmerNHANES_month_re,lmerVeterans_month_re,lmerST_data_month_re,lmerST_data_month_F_re)
monthlyData$sex <- factor(monthlyData$sex,levels=c("men","women"))
monthlyData$race <- factor(monthlyData$race,levels=c("white"))
monthlyData$period <- factor(monthlyData$period,levels=c("UAVCW","NHANES","STRIDE"))

ggplot(data=monthlyData[!is.na(monthlyData$month),],aes(x=month, y=re, color = sex)) + geom_point() + geom_linerange(aes(ymin=low, ymax=high)) + labs(title="Month effect on temperature", x="", y="Temperature Difference, C", colour="", fill="") + theme(legend.position="none", axis.text.x= element_text(angle = 60, hjust = 1)) + facet_grid(sex ~ period) + scale_colour_manual(values = plot_colors [c(9,8 )])
 

```
