# Supplementary material for: Decreasing human body temperature in the United States since the Industrial Revolution
Source: eLife. 2020 Jan 7;9:e49555. doi: 10.7554/eLife.49555 (PMC6946399; doi:10.7554/eLife.49555)
Supplement: Table 1—source code 1. [file elife-49555-table1-code1.rmd]

---
title: "Table 1 data source"
output: html_document
---


```{r message = FALSE, warning = FALSE}
library(easyGgplot2)
#ggplot2.multiplot(..., plotlist=NULL, cols=2)
library(easyGgplot2)
library(lme4)
library(merTools)
combinedData <- read.csv("~/Desktop/Temperature study/combined_data.csv")

combinedData$time_HR_imputed <- combinedData$time_HR
combinedData$time_HR_imputed[is.na(combinedData$time_HR_imputed)] <- 12

dataVeterans  <- read.csv('~/Desktop/Temperature study/veterans_processed.csv')
dataNHANES    <- read.csv('~/Desktop/Temperature study/NHANES_processed.csv')
ST_data 	  <- read.csv('~/Desktop/Temperature study/STRIDE_processed.csv')

dataVeterans$race <- factor(as.character(dataVeterans$race),levels = c("white", "black"))
combinedData$race [combinedData$race=="asian"]<- "other"
combinedData$race <- factor(combinedData$race,levels = c("white", "black","other" ))
dataNHANES$race[dataNHANES$race == "unknown"] <- NA
dataNHANES$race <- factor(dataNHANES$race,levels = c("white", "black","other" ))
ST_data$race [ST_data$race=="Asian"]<- "Other"
ST_data$race <- factor(ST_data$race,levels = c("White", "Black","Other"))
ST_data$exam_month<-factor (ST_data$exam_month)

dataVeterans$state_type <- factor(dataVeterans$state_type, levels = c("very cold", "cold","moderately_cold","moderate","warm", "hot"))

dataNHANES$exammonth <-as.factor(dataNHANES$exammonth)
dataVeterans$exammonth <-as.factor(dataVeterans$exammonth)


state_temps <- read.csv("~/Desktop/Temperature study/state_temps.csv")
state_codes <- read.csv("~/Desktop/Temperature study/state_codes.csv")
state_codes$Code <- factor(as.character(state_codes$Code), levels=levels(dataVeterans$state))
state_temps$state_code <- state_codes$Code[match(as.character(state_temps$state),as.character(state_codes$State))]

dataVeterans$ambient_temp <- (state_temps$value[match(paste(dataVeterans$state,(dataVeterans$examyear * 100 + as.numeric(dataVeterans$exammonth))), paste(state_temps$state_code,state_temps$date))] - 32) / 1.8

ST_data$state <- "CA"
  
ST_data$ambient_temp <- (state_temps$value[match(paste(ST_data$state,(ST_data$exam_year * 100 + as.numeric(ST_data$exam_month))), paste(state_temps$state_code,state_temps$date))] - 32) / 1.8

```

```{r message = FALSE, warning = FALSE}
summary(combinedData)


summary(combinedData$age[combinedData$period=="1860-1940"])
summary(combinedData$age[combinedData$period=="1971-1975"])
summary(combinedData$age[combinedData$period=="2007-2017"])


summary(combinedData$weight_KG [combinedData$period=="1860-1940"])
summary(combinedData$weight_KG [combinedData$period=="1971-1975"])
summary(combinedData$weight_KG [combinedData$period=="2007-2017"])


summary(combinedData$height_CM [combinedData$period=="1860-1940"])
summary(combinedData$height_CM [combinedData$period=="1971-1975"])
summary(combinedData$height_CM [combinedData$period=="2007-2017"])
